# Supplementary material for: Spint1 disruption in mouse pancreas leads to glucose intolerance and impaired insulin production involving HEPSIN/MAFA
Source: PubMed Central journal article supplement — Nat Commun. 2024 Dec 3;15:10537. doi: 10.1038/s41467-024-54927-2 (PMC11615295; doi:10.1038/s41467-024-54927-2), 2024-12-03
Supplement: 41467_2024_54927_MOESM1_ESM.pdf [file 41467_2024_54927_MOESM1_ESM.pdf]

1  
2  
3  
4  
5  
6  
7  
8  
9  
10  
11  
12  
13  
14  
15  
16  
17  
18  
19  
20  
21

Supplementary Information for manuscript

***Spint1* disruption in mouse pancreas leads to glucose intolerance and impaired insulin production involving HEPSIN/MAFA.**

Hsin-Hsien Lin, et al.

Table of content

**Supplementary Figures ..... 2**

Supplementary Figure 1 ..... 2

Supplementary Figure 2 ..... 5

Supplementary Figure 3 ..... 7

Supplementary Figure 4 ..... 12

Supplementary Figure 5 ..... 14

Supplementary Figure 6 ..... 18

Supplementary Figure 7 ..... 21

Supplementary Figure 8 ..... 24

Supplementary Figure 9 ..... 27

Supplementary Figure 10 ..... 30

Supplementary Figure 11 ..... 31

**Supplementary Methods ..... 32**

**Supplementary Table ..... 37**

**Reference ..... 38**

22 **Supplementary Figures**

23 **Supplementary Figure 1**

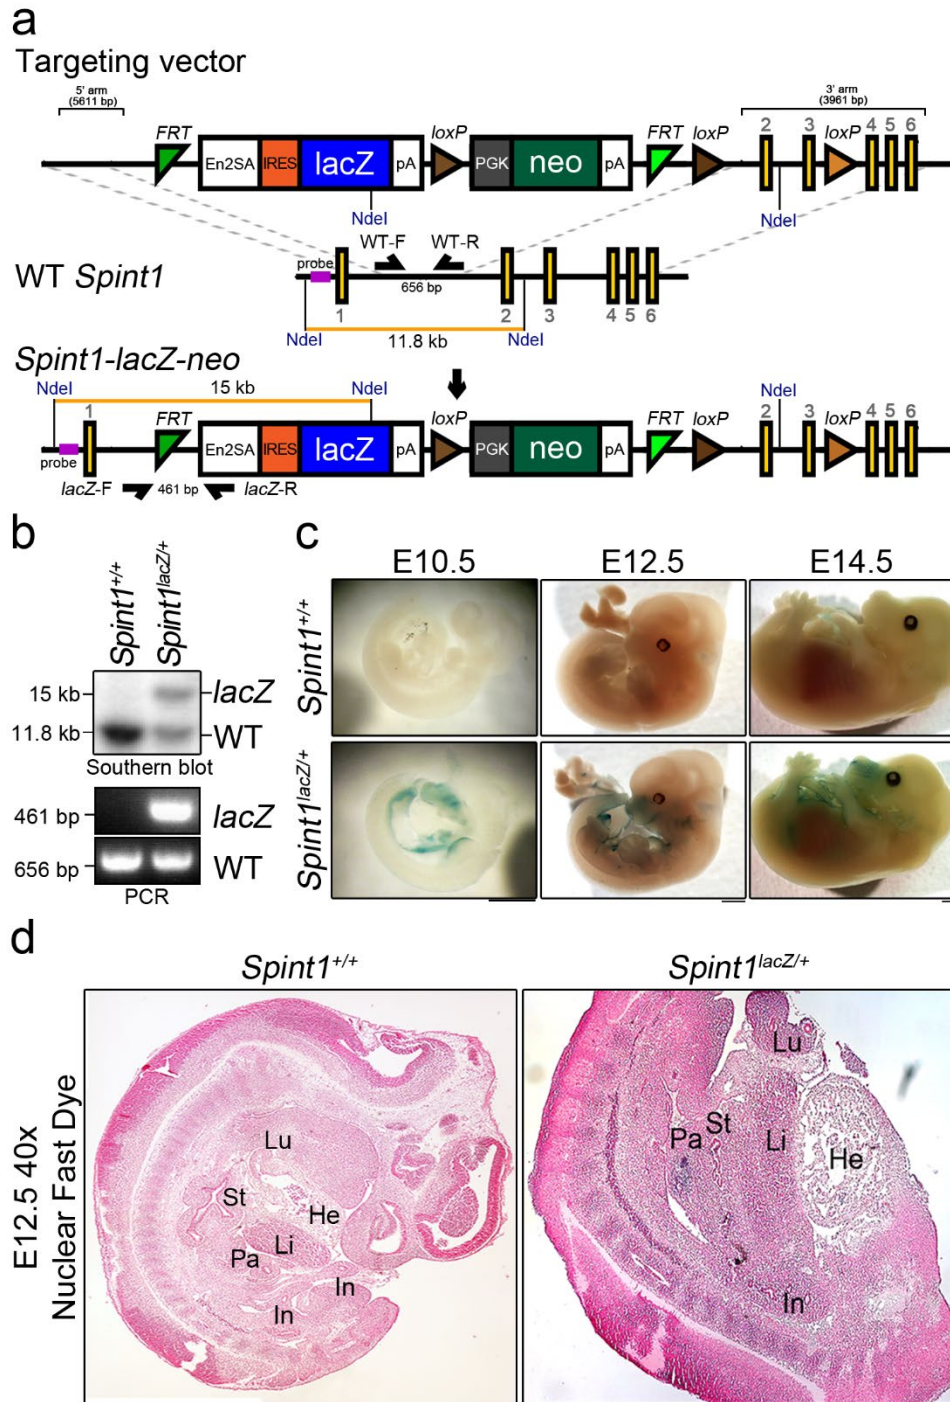

24

25 **Supplementary Fig. 1. Spatiotemporal expression patterns of *Spint1-lacZ* during**

26 ***Spint1<sup>lacZ/+</sup>* mouse embryo development.**

27 **a**, Generation of *Spint1<sup>lacZ/+</sup>* mice. Maps of the targeting vector (upper), wild-type  
28 *Spint1* allele (WT *Spint1*, middle), and recombinant allele in the *Spint1* intron 1  
29 (*Spint1-lacZ-neo*, lower). The *lacZ-neo* fusion cassette was inserted into the first  
30 intron of *Spint1* via homologous recombination. An extra NdeI site in *lacZ* cDNA  
31 enabled the distinction between wild-type and recombinant alleles using Southern  
32 blotting. Probe: a 5' probe used for Southern blotting. WT-F and WT-R: the primer  
33 pair for wild-type *Spint1* allele. *lacZ*-F and *lacZ*-R: the primer pair for *Spint1-lacZ*  
34 allele. 1-6: the exons of *Spint1*. *FRT* and *loxP*: flippase and Cre recognition sites,  
35 respectively. **b**, Southern blotting and genotyping for wild-type and *Spint1<sup>lacZ/+</sup>*  
36 embryonic stem (ES) cells and mice. Wild-type *Spint1* (*Spint1<sup>+/+</sup>*) and recombinant  
37 *Spint1<sup>lacZ/+</sup>* ES cell clones were determined using Southern blotting. The probe is  
38 described in Supplementary Fig. 1a. The sizes of NdeI-cleaved fragments of *Spint1<sup>+/+</sup>*  
39 and *Spint1<sup>lacZ/+</sup>* alleles were approximately 11.8 kb and 15 kb, respectively (upper  
40 panel). Moreover, PCR-based genotyping was performed using mouse tail DNAs and  
41 the wild-type (WT) and *lacZ* primer pairs described in Supplementary Fig. 1a. The  
42 PCR products for wild-type and *Spint1-lacZ* alleles were 656 bp and 461 bp in size  
43 after agarose electrophoresis, respectively. **c**, Representatives of E10.5, E12.5, and

44 E14.5 whole-mount LacZ-stain embryos from wild-type (*Spint1*<sup>+/+</sup>) and *Spint1*<sup>lacZ/+</sup>  
45 mice. Scale bar, 200  $\mu$ m. (n= 4 per group). **d**, Representative histology images of  
46 LacZ-stained E12.5 *Spint1*<sup>lacZ/+</sup> and *Spint1*<sup>+/+</sup> embryos. The LacZ-stained E12.5  
47 *Spint1*<sup>lacZ/+</sup> and *Spint1*<sup>+/+</sup> mouse embryos were sectioned *sagittally* and counterstained  
48 with nuclear fast red. Lu: Lung, St: Stomach, He: Heart, Li: Liver, Pa: Pancreas, In:  
49 Intestine. Scale bar, 100  $\mu$ m. Source data are provided as a Source Data file.  
50

51 Supplementary Figure 2

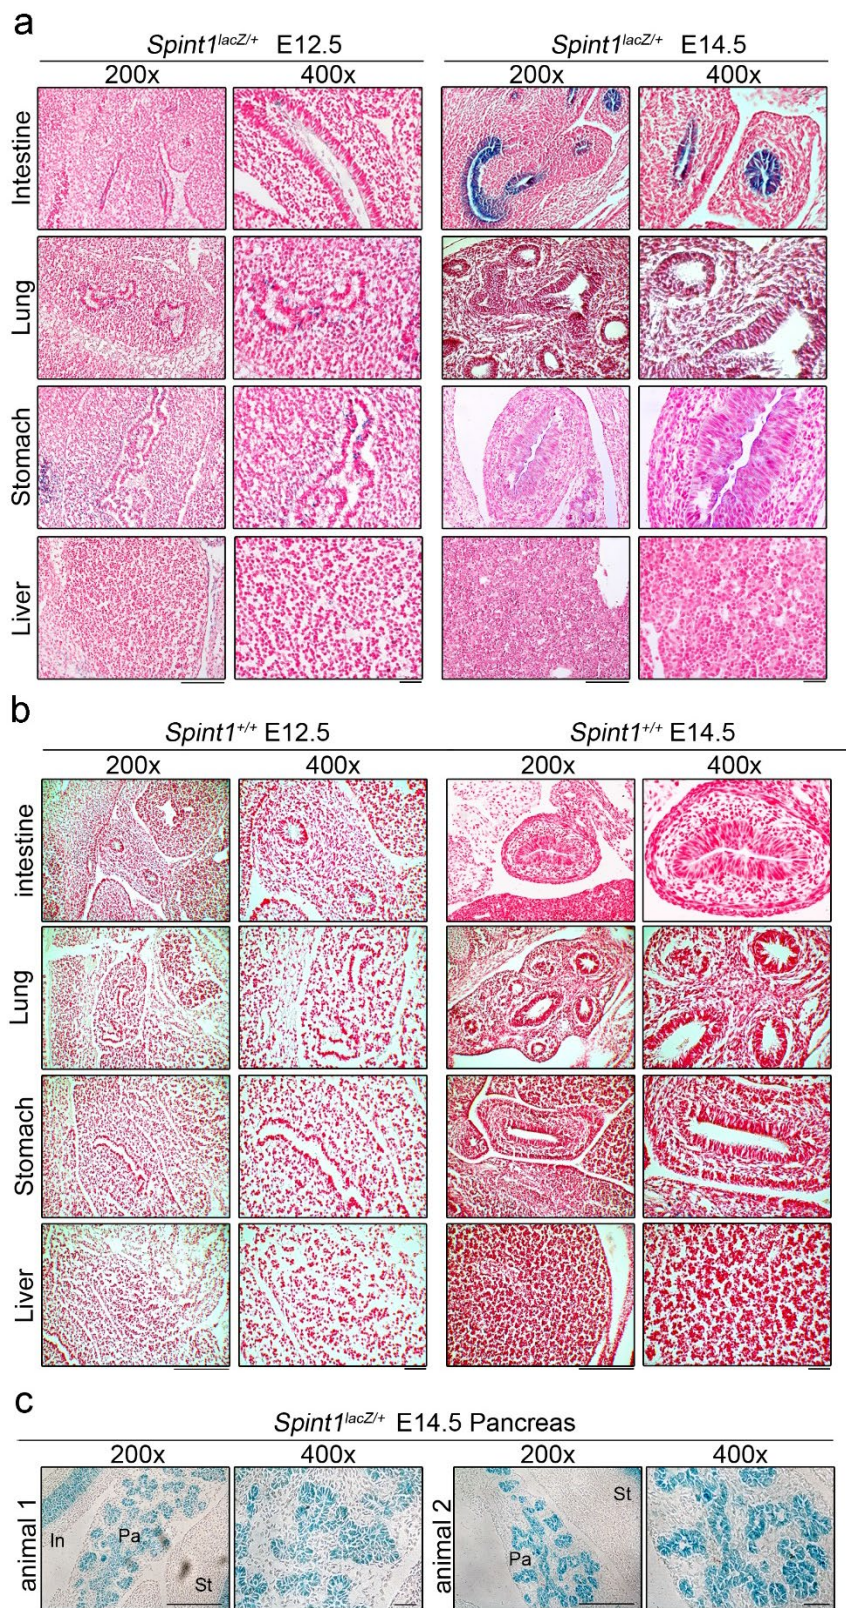

52

53 Supplementary Fig. 2. The *Spint1-lacZ* expression patterns in the embryonic

54 **intestine, lung, stomach, liver, and pancreas in *Spint1*<sup>+/+</sup> and *Spint1*<sup>lacZ/+</sup> mouse**  
55 **embryos.**

56 **a,** Expression levels of *Spint1-lacZ* in the intestine, lung, stomach and liver in E12.5  
57 and E14.5 *Spint1*<sup>lacZ/+</sup> embryos after X-gal staining. Mouse E12.5 and E14.5  
58 *Spint1*<sup>lacZ/+</sup> embryos were incubated with an X-gal solution to reveal LacZ activity.  
59 After incubation, embryos were dissected and counterstained by nuclear fast red. **b,**  
60 Images of the intestine, lung, stomach, and liver in E12.5 and E14.5 *Spint1*<sup>+/+</sup>  
61 embryos after X-gal-staining. Representative X-gal-stained embryo sections were  
62 counterstained by nuclear fast red. These images were used as controls for  
63 Supplementary Fig. 2a. **c,** High expression levels of *Spint1-lacZ* in the E14.5 pancreas  
64 of two different embryos. Representative microscopic images of pancreatic sections  
65 of X-gal-stained E14.5 *Spint1*<sup>lacZ/+</sup> embryos without counterstaining. In: Intestine, St:  
66 Stomach, Pa: Pancreas. The results showed that the whole primordial pancreatic duct  
67 and acini-like structures exhibited strong lacZ signals. Scale bar, 100 μm for 200×  
68 panels; 20 μm for 400× panels.

69 Supplementary Figure 3

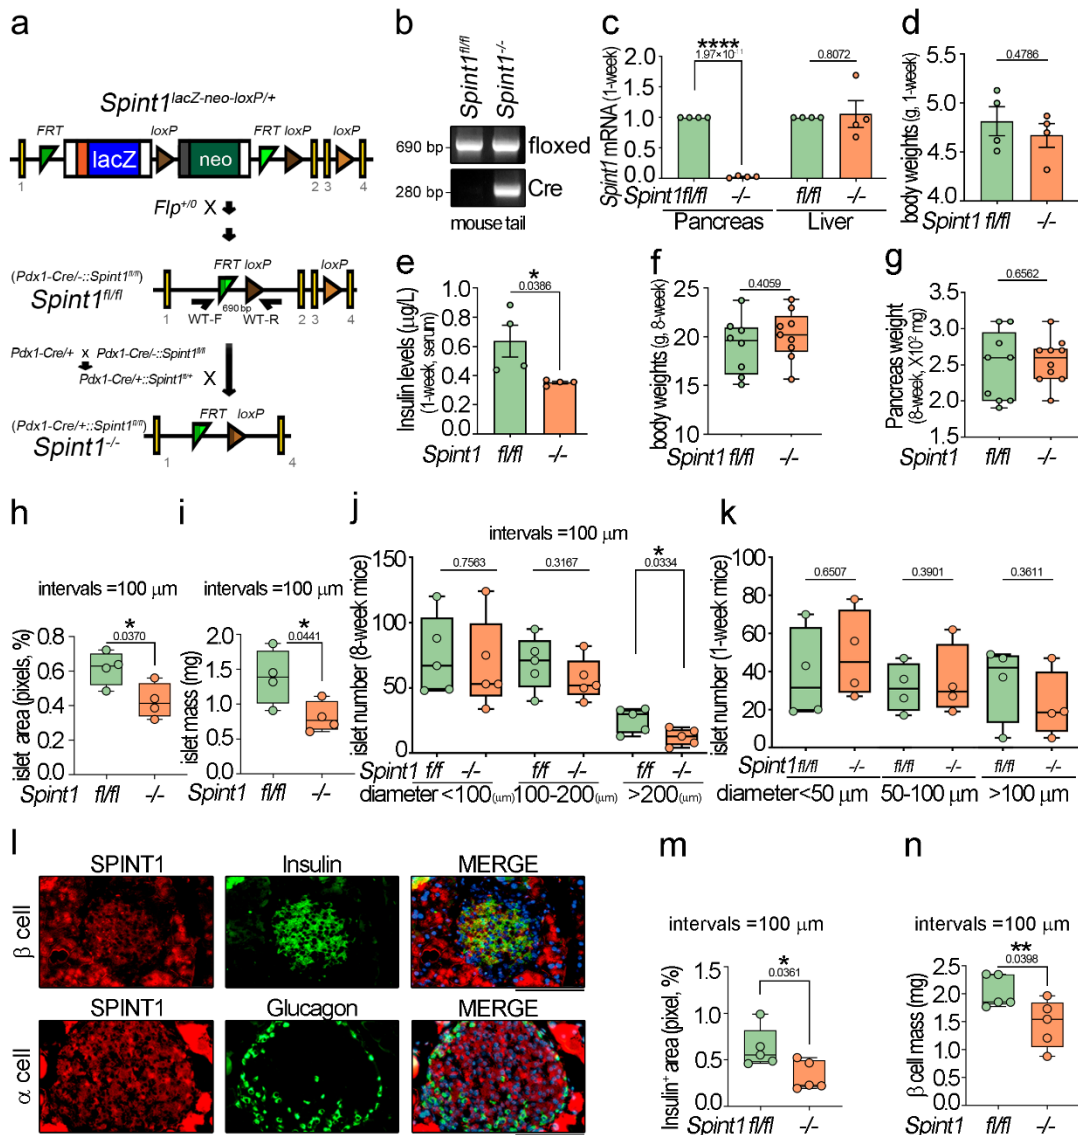

70

71 **Supplementary Fig. 3. Phenotypic characteristics of 1-week-old and 8-week-old**

72 **mice with pancreas-specific *Spint1* deficiency.**

73 **a**, Generation of pancreas-specific *Spint1*-deficient (*Spint1*<sup>-/-</sup>) mice. The *Spint1*<sup>lacZ-neo-</sup>

74 <sup>loxP/+</sup> mice, harboring the recombinant allele *Spint1-lacZ-neo* (top), were mated with

75 FLP-expressing mice (*Flp*<sup>+/+</sup>) to remove the *lacZ* reporter cassette and generate the

76 *loxP*-floxed wild-type *Spint1* control mice (*Spint1<sup>fl/fl</sup>*, middle). For generating the  
77 pancreas-specific *Spint1*-deficient mice (bottom), the *Spint1<sup>fl/fl</sup>* mice were crossed  
78 with *Pdx1-Cre/+* mice to delete exons 2 and 3 in the mouse pancreas, resulting in the  
79 generation of *Pdx1-Cre/+::Spint1<sup>fl/fl</sup>* (namely *Spint1<sup>-/-</sup>*) mice. **b**, Genotyping for  
80 *Spint1<sup>fl/fl</sup>* and *Spint1<sup>-/-</sup>* mice. Primers WT-F and WT-R (depicted in Supplementary  
81 Fig. 1a) were used to amplify the *lacZ-neo* reporter-deleted intron 1 region in the  
82 floxed wild-type allele, employing mouse tail DNA. The sizes of the floxed wild-type  
83 *Spint1* PCR product and *Cre* PCR product were 690 bp and 280 bp, respectively. **c**,  
84 Validation of *Spint1* expression in the pancreas and livers of 1-week-old *Spint1<sup>-/-</sup>* mice  
85 using Q-RT-PCR. The pancreas (left) and liver (right) were isolated from 1-week-old  
86 *Spint1<sup>fl/fl</sup>* and *Spint1<sup>-/-</sup>* mice and subjected to RNA extraction and reverse transcription.  
87 The mRNA levels of *Spint1* were measured using Q-RT-PCR with normalization to  
88 *Gapdh* (4 mice per group). **d**, Body weights analysis of 1-week-old *Spint1<sup>fl/fl</sup>* and  
89 *Spint1<sup>-/-</sup>* mice (n= 4 mice per group). **e**, Examination of the serum insulin levels in 1-  
90 week-old *Spint1<sup>fl/fl</sup>* and *Spint1<sup>-/-</sup>* mice using an ELISA kit (4 mice per group). **f**, Body  
91 weights analysis of 8-week-old *Spint1<sup>fl/fl</sup>* and *Spint1<sup>-/-</sup>* mice (n= 8 for *Spint1<sup>fl/fl</sup>* mice  
92 and n= 9 for *Spint1<sup>-/-</sup>* mice). **g**, Pancreas weights analysis of 8-week-old *Spint1<sup>fl/fl</sup>* and  
93 *Spint1<sup>-/-</sup>* mice (n= 9 for *Spint1<sup>fl/fl</sup>* mice and n= 10 for *Spint1<sup>-/-</sup>* mice). **h-j**,  
94 Quantification of islet area percentage, islet mass, and islet numbers in 8-week-old



95 *Spint1*<sup>-/-</sup> and *Spint1*<sup>fl/fl</sup> mice using sections taken at 100 μm intervals throughout the  
96 whole mouse pancreas. **h**, Each pancreas underwent serial sections (300 sections per  
97 pancreas), and one out of every 20 serial sections (100 μm intervals for each section)  
98 was taken for H&E staining to reveal islet areas. ImageJ determined the percentage of  
99 islet area in a whole pancreas area based on the merged full-view microscopic images  
100 of 15 sections per mouse (4 mice per group). **i**, The islet mass was calculated by  
101 multiplying the islet area percentage in **h** by pancreas weight in **g** (n = 4 per group). **j**,  
102 Islet number quantification in the pancreas of 8-week-old *Spint1*<sup>fl/fl</sup> and *Spint1*<sup>-/-</sup> mice.  
103 The islets with a diameter below 100 μm were defined as small islets, those with a  
104 diameter between 100 μm and 200 μm as medium islets, and those with a diameter  
105 above 200 μm as large islets. The islet diameters were measured using ImageJ from  
106 H&E-stained microscopic images, with one section selected from every 20 serial  
107 sections (300 sections per pancreas), comprising 15 sections per mouse and four mice  
108 per group. **k**, Islet number quantification in the pancreas of 1-week-old *Spint1*<sup>fl/fl</sup> and  
109 *Spint1*<sup>-/-</sup> mice. The islets with a diameter below 50 μm were defined as small islets,  
110 those with a diameter between 50 μm and 100 μm as medium islets, and those with a  
111 diameter above 100 μm as large islets. The islet diameters were measured using  
112 ImageJ from H&E-stained microscopic images, with one section selected from every  
113 20 serial sections (300 sections per pancreas), comprising 15 sections per mouse and 4

114 mice per group. **l**, Immunofluorescence images of SPINT1, glucagon ( $\alpha$  cell), and  
115 insulin ( $\beta$  cell) in mouse islets using immunofluorescence microscopy. Mouse  
116 pancreatic sections were immunohistochemically stained using an anti-SPINT1  
117 antibody. Subsequently, the sections were stripped, followed by immunofluorescent  
118 staining using anti-glucagon or anti-insulin antibodies (detailed procedures in Method  
119 sections). The IHC results of SPINT1 were pseudo-colored in red (left panels), while  
120 insulin or glucagon was visualized by fluorochrome-labeled secondary antibody  
121 (green, middle panels). Nuclei were counterstained with DAPI (blue). Their merged  
122 images were shown in the right panels. Scale bar, 20  $\mu\text{m}$ . **m-n**, Quantification of  
123 percentages of the insulin-positive area and  $\beta$  cell mass in 8-week-old *Spint1<sup>fl/fl</sup>* and  
124 *Spint1<sup>-/-</sup>* mice, using sections taken at 100  $\mu\text{m}$  intervals throughout the whole mouse  
125 pancreas. **m**, Each pancreas underwent serial sections (300 sections per pancreas) in  
126 which one out of every 20 serial sections (100  $\mu\text{m}$  intervals for each section) was  
127 taken for immunohistochemical stained using an anti-insulin antibody and were  
128 determined based on the merged full-view microscopic images of 15 sections per  
129 mouse (4 mice per group) using ImageJ. **n**, The  $\beta$  cell mass was calculated by  
130 multiplying the insulin-positive area percentage in **k** by the pancreas weight in **g**.  
131 Statistical significance was assessed using a two-tailed Student's *t*-test for all panels.  
132 For bar plots, bars are represented as mean  $\pm$  SEM. In the box plots, the boxes span

133 from the 25th to the 75th percentiles, with a line indicating the median. Whiskers  
134 extend to values within 1.5 times the interquartile range, defined as the difference  
135 between the 25th and 75th percentiles. \*,  $P < 0.05$ ; \*\*,  $P < 0.01$ ; \*\*\*\*,  $P < 0.001$ .  
136 Below the asterisks are the precise statistical results. Source data are provided as a  
137 Source Data file.

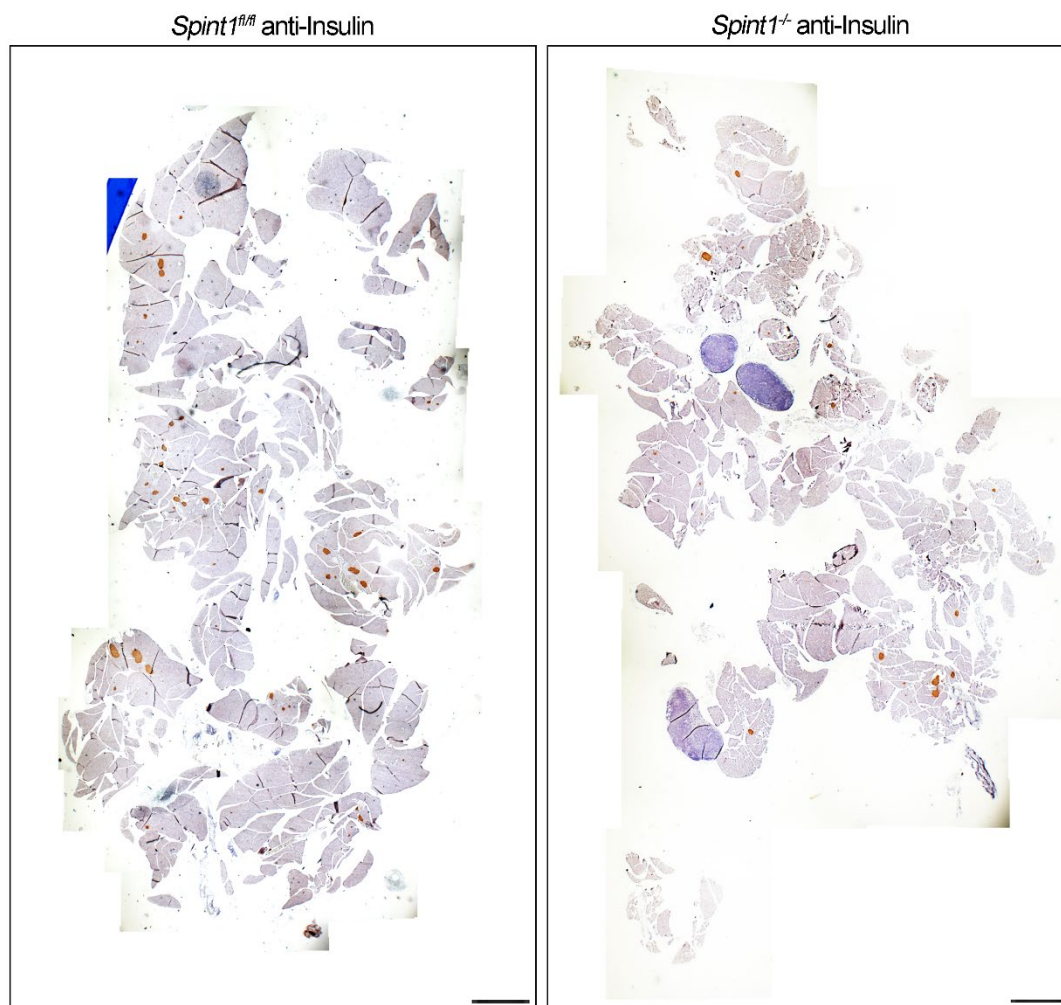

139

140 **Supplementary Fig. 4. Representative full-view images of 8-week-old *Spint1<sup>fl/fl</sup>***  
141 **and *Spint1<sup>-/-</sup>* pancreatic sections after immunohistochemical staining using an**  
142 **anti-insulin antibody.**

143 The pancreas sections of 8-week-old *Spint1<sup>fl/fl</sup>* and *Spint1<sup>-/-</sup>* mice were  
144 immunohistochemically stained using an anti-insulin antibody and counterstained  
145 with hematoxylin. All the low-power filed images taken from the same slide of the  
146 pancreas were merged using Photoshop software to restore the complete view of the

147 pancreas. The area of whole pancreas in this study was calculated based on the full-

148 view images. Scale bar, 250 mm.

149

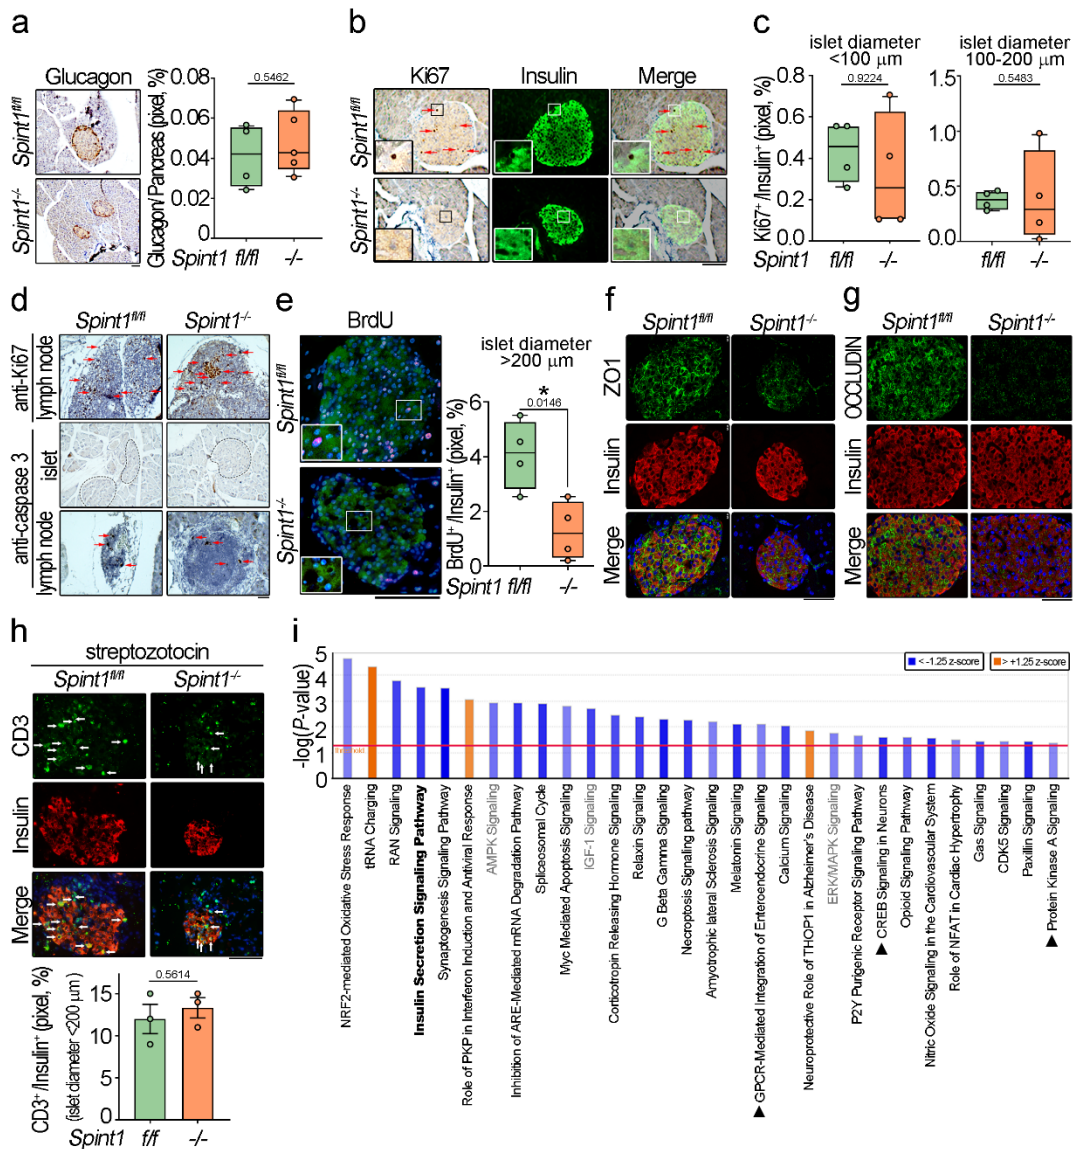

151

152 **Supplementary Fig. 5. Islet phenotypes in 8-week-old mice with pancreas-specific**

153 ***Spint1* deficiency analyzed through proliferation and apoptosis markers, tight**

154 **junction proteins, and islet CD3<sup>+</sup> cells percentage.**

155 **a, Percentages of glucagon-positive areas in the pancreas of 8-week-old *Spint1<sup>fl/fl</sup>* and**

156 ***Spint1<sup>-/-</sup>* mice. Pancreatic sections were immunohistochemically stained for glucagon**

157 **(α cell) and counterstained with hematoxylin. Glucagon-positive areas in the pancreas**

158 were analyzed using ImageJ, with percentages calculated by dividing glucagon-  
159 positive pixels by total pancreas pixels (3 sections per pancreas and four mice per  
160 group). Representative microscopic images were shown in the left panel. Scale bar, 20  
161  $\mu\text{m}$ . **b**, Detection of Ki67-positive  $\beta$  cells in the pancreatic islets of 8-week-old  
162 *Spint1<sup>fl/fl</sup>* and *Spint1<sup>-/-</sup>* mice. Pancreatic sections underwent IHC using an anti-Ki67  
163 antibody (left panel) and subsequent immunofluorescence microscopy using an anti-  
164 insulin antibody (middle panel). Ki67-positive  $\beta$  cells are shown in the merged images  
165 (right panel). Scale bar, 20  $\mu\text{m}$ . High-magnification images are shown in the insets at  
166 the lower left corner of each panel. **c**, The percentages of Ki67<sup>+</sup>  $\beta$  cells in the small-  
167 diameter islets (< 100  $\mu\text{m}$ ) and medium-diameter (100-200  $\mu\text{m}$ ) of 8-week-old  
168 *Spint1<sup>fl/fl</sup>* and *Spint1<sup>-/-</sup>* mice. The percentages of Ki67<sup>+</sup>  $\beta$  cells (detected by insulin  
169 expression) in the medium and small islets of the pancreas were statistically  
170 calculated from 6 sections under 300  $\mu\text{m}$  intervals per pancreas (4 mice per group)  
171 and shown in the left and right panels. The percentages of large islets (islet diameter >  
172 200  $\mu\text{m}$ ) are shown in Fig. 2**d**. **d**, Detection of caspase 3 and Ki67 in the lymph nodes  
173 or islets of 8-week-old *Spint1<sup>fl/fl</sup>* and *Spint1<sup>-/-</sup>* mice. Representative  
174 immunohistochemistry images of Ki67 and caspase 3 in the lymph nodes or islets of  
175 *Spint1<sup>fl/fl</sup>* and *Spint1<sup>-/-</sup>* mice are presented. As some caspase-3-positive signals in the  
176 mouse lymph nodes (bottom panel), no definite caspase 3 signal can be seen in the

177 pancreatic islets (middle panel) of *Spint1<sup>fl/fl</sup>* and *Spint1<sup>-/-</sup>* mice (3 sections per pancreas  
178 and three mice per group). Scale bar, 20  $\mu\text{m}$ . **e**, Analysis of bromodeoxyuridine  
179 (BrdU) incorporation rate in the pancreatic  $\beta$  cells of 8-week-old *Spint1<sup>fl/fl</sup>* and *Spint1<sup>-/-</sup>*  
180  $^{-/-}$  mice. Mice were daily treated with sterile drinking water containing BrdU (1  
181 mg/mL) for 14 days. Representative images after immunofluorescence microscopy  
182 showed the merged signals for BrdU (pink), insulin (green), and DAPI (blue) in the  
183 left panel. Scale bar, 20  $\mu\text{m}$ . The rates of BrdU incorporation in  $\beta$  cells were  
184 quantified in the large pancreatic islets [6 sections per pancreas (300  $\mu\text{m}$  intervals)  
185 and four mice per group], as shown in the right panel. High-magnification images are  
186 shown in the insets at the lower left corner of each panel. **f-g**, Immunofluorescence  
187 analysis of ZO1 (**f**) and OCCLUDIN (**g**) in the pancreatic islets of 8-week-old  
188 *Spint1<sup>fl/fl</sup>* and *Spint1<sup>-/-</sup>* mice. Mouse pancreatic sections were subjected to  
189 immunofluorescence microscopy to detect ZO1 (green) or OCCLUDIN (green) in  
190 insulin-positive (red) cells (3 sections per mouse, 3 mice per group). Nuclei were  
191 counterstained with DAPI (blue). Scale bar, 20  $\mu\text{m}$ . **h**, Analysis of CD3<sup>+</sup> immune cells  
192 in the pancreatic islets of *Spint1<sup>fl/fl</sup>* and *Spint1<sup>-/-</sup>* mice following streptozotocin  
193 treatment. After streptozotocin treatment in Fig. 2k, the mouse pancreatic sections  
194 were subjected to immunohistochemical staining to detect CD3<sup>+</sup> immune cells (green)  
195 among insulin<sup>+</sup> regions (red). White arrows mark the Ki67<sup>+</sup>  $\beta$  cells in the CD3 and



196 merge images. Nuclei were counterstained with DAPI (blue). Scale bar, 20  $\mu\text{m}$ . The  
197 percentages of CD3<sup>+</sup> cells relative to insulin<sup>+</sup> regions (3 sections per mouse, 3 mice  
198 per group) are presented in the bottom panel. **i**, Ingenuity Pathway Analysis (IPA) of  
199 the differential protein profiles in *Spint1*<sup>-/-</sup> islets compared to *Spint1*<sup>fl/fl</sup> islets. Thirty  
200 signal pathways were identified under the criteria of the  $-\log(P\text{-value})$  value over  
201 1.25. Statistical analysis was performed using a two-sided Fisher's exact test, and the  
202 false discovery rate was controlled using the Benjamini-Hochberg procedure to  
203 correct *P* values. The down-regulated pathways in *Spint1*<sup>-/-</sup> islets compared to  
204 *Spint1*<sup>fl/fl</sup> islets are highlighted by blue bars, while orange ones indicate the up-  
205 regulated pathways. Black triangles mark GPCR, CREB, and PKA signaling  
206 pathways. Statistical significance was assessed using a two-tailed Student's *t*-test for  
207 **a**, **c**, **e** and **h**. For bar plots, bars are represented as mean  $\pm$  SEM. In the box plots, the  
208 boxes span from the 25th to the 75th percentiles, with a line indicating the median.  
209 Whiskers extend to values within 1.5 times the interquartile range, defined as the  
210 difference between the 25th and 75th percentiles. \*, *P* < 0.05. Below the asterisks are  
211 the precise statistical results. Source data are provided as a Source Data file.

212 Supplementary Figure 6

213

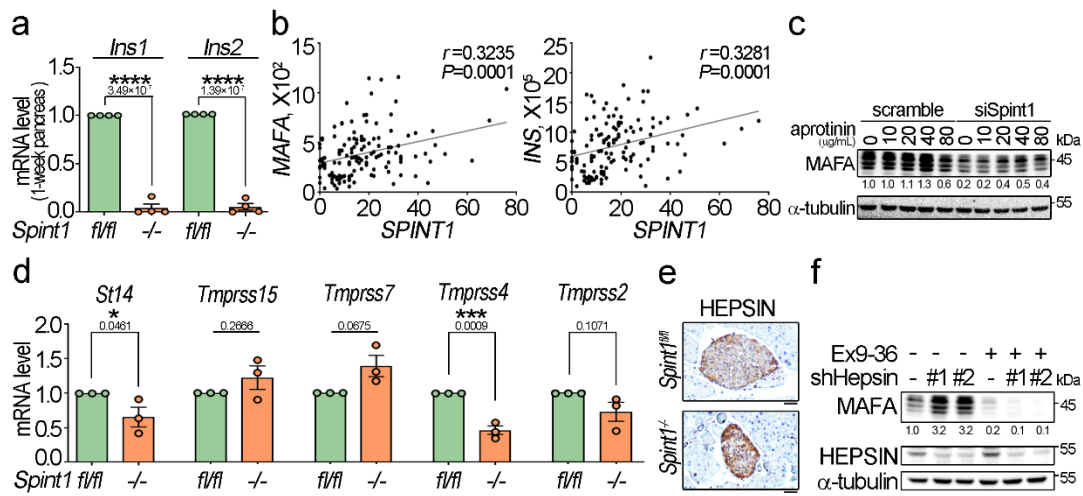

214

215 **Supplementary Fig. 6. Analysis of the expression levels of *Ins1*, *Ins2*, selected**

216 **serine proteases, and HEP SIN in *Spint1<sup>fl/fl</sup>* and *Spint1<sup>-/-</sup>* mouse pancreas/islets, the**

217 **effect of aprotinin, *Hepsin* silencing, and Ex9-36 on the MAFA protein levels, as**

218 **well as correlations between *SPINT1* and *MAFA/INS* expression in human  $\beta$**

219 **cells.**

220 **a**, Analysis of *Ins1* and *Ins2* expression levels in the pancreas of 1-week-old *Spint1<sup>fl/fl</sup>*

221 and *Spint1<sup>-/-</sup>* mice. Mouse pancreas RNAs were extracted and subjected to Q-RT-PCR

222 analysis with normalization to *Gapdh* (n= 4 mice per group). The results showed that

223 the expression levels of *Ins1* and *Ins2* were significantly reduced in the pancreas of 1-

224 week-old *Spint1<sup>-/-</sup>* mice compared to *Spint1<sup>fl/fl</sup>* mice. **b**, Correlation of the expression

225 levels between *SPINT1* and *MAFA* (left panel) and between *INS* and *SPINT1* (right

226 panel) in human pancreatic islets using the GSE164416 dataset. The Pearson

227 correlation coefficients ( $r$ ) are shown in figures (n= 133 per group) and statistical  
228 significance was determined using a two-sided Pearson's correlation test. Gray lines  
229 represent the linear regression line. **c**, Effect of a broad serine protease inhibitor,  
230 aprotinin, on the expression of MAFA in *Spint1*-silenced NIT-1 cells. NIT-1 cells were  
231 transfected with siSpint1 or scramble siRNA and then incubated with regular culture  
232 media in the presence of 0, 10, 20, 40, and 80  $\mu\text{g/mL}$  aprotinin for 24 hours. Cell  
233 lysates were collected and subjected to immunoblot analysis using an anti-MAFA  
234 antibody.  $\alpha$ -tubulin was used as a loading control. The intensities of MAFA bands  
235 were measured using ImageJ, normalized to  $\alpha$ -tubulin, and statistically calculated  
236 from three independent experiments. The mean values relative to the control of  
237 scramble siRNA without aprotinin are presented at the bottom of the MAFA image. **d**,  
238 Q-RT-PCR analysis of *St14* (matriptase), *Tmprss15*, *Tmprss7*, *Tmprss4*, and *Tmprss2*  
239 mRNA levels in 8-week-old *Spint1<sup>fl/fl</sup>* and *Spint1<sup>-/-</sup>* mouse islets. Isolated mouse islets  
240 were subjected to RNA extraction and Q-RT-PCR with normalization to *Gapdh*. The  
241 expression levels of each gene were statistically calculated from three independent  
242 experiments (n= 3 mice per group). **e**, IHC analysis of HEPSIN in the pancreas of  
243 *Spint1<sup>fl/fl</sup>* and *Spint1<sup>-/-</sup>* mouse islets. Mouse pancreas samples were  
244 immunohistochemically stained, and representative images are shown here. The  
245 results were further statistically calculated for HEPSIN expression and shown in Fig.

246 4i. Scale bar, 20  $\mu\text{m}$ . **f**, Ex9-36 treatment reversed the effect of *Hepsin* silencing on  
247 MAFA expression. NIT-1 cells were infected with two different *Hepsin*-targeting  
248 shRNAs (shHepsin #1 and #2) lentivirus for 48 hours and then treated with GLP1R  
249 antagonist Ex9-36 for 24 hours. Cell lysates were collected and subjected to western  
250 blot analysis using anti-MAFA and anti-HEPSIN antibodies, with  $\alpha$ -tubulin serving as  
251 a loading control. Statistical significance was determined using a two-tailed Student's  
252 *t*-test for **a** and **d**. All data were represented as mean  $\pm$  SEM. \*,  $P < 0.05$ ; \*\*\*,  $P <$   
253 0.001; \*\*\*\*,  $P < 0.0001$ . Below the asterisks are the precise statistical results. Source  
254 data are provided as a Source Data file.

255

256

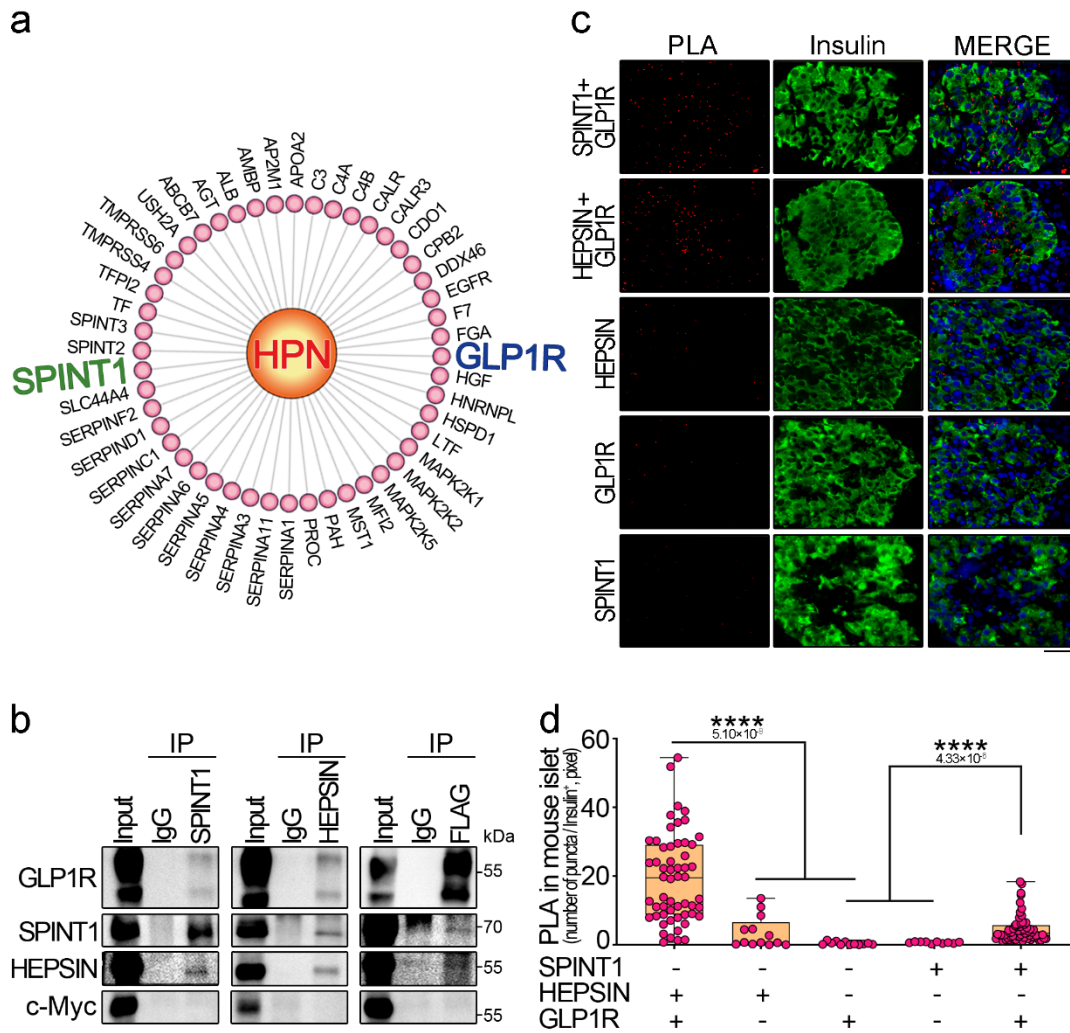

260 **Supplementary Fig. 7. The Interactions of SPINT1, HESPIN, and GLP1R in**

261 **human islets and  $\beta$  cells.**

262 **a**, Analysis of HESPIN interactomes using STRING database (<http://string-db.org>).

263 The results revealed many potential HESPIN-interacting proteins; among them,

264 GLP1R caught our attention because of its important role in pancreatic  $\beta$  cells. **b**,

265 Determination of SPINT1, HESPIN, and GLP1R interactions in a complex using co-

266 immunoprecipitation assays. HEK293T cells were transiently transfected with *Spint1*,  
267 *Hepsin*, and *Glp1r* plasmids. Cell lysates were then subjected to immunoprecipitation  
268 (IP) using anti-SPINT1 (left panel), anti-HEPSIN (middle panel), and anti-FLAG-tag  
269 antibodies (right panel, for N-terminally FLAG-tagged GLP1R). IgG served as IP  
270 control. Immunoprecipitated proteins were then subjected to immunoblotting using  
271 anti-SPINT1, anti-HEPSIN, and anti-FLAG-tag antibodies, with c-Myc as input  
272 control. **c**, Examination of the protein-protein interaction among SPINT1, HEPSIN,  
273 and GLP1R in human islets using the proximity ligation assay (PLA). Human  
274 pancreatic sections were subjected to PLA using two pairs of primary antibodies: anti-  
275 GLP1R vs. anti-SPINT1 and anti-GLP1R vs. anti-HEPSIN. Positive interaction  
276 signals in PLA were visualized as red puncta. The samples were also  
277 immunohistochemically stained using an anti-insulin antibody (green). Nuclei were  
278 counterstained with DAPI (blue). A set of representative images after the PLA  
279 analysis was shown. Scale bar, 20  $\mu\text{m}$ . **d**, Quantification of PLA results in human  
280 islets in **c**. The red puncta in insulin-positive areas were counted and statistically  
281 calculated from three independent experiments using a two-tailed Student's *t*-test. In  
282 the box plots, the boxes span from the 25th to the 75th percentiles, with a line  
283 indicating the median. Whiskers extend to values within 1.5 times the interquartile  
284 range, defined as the difference between the 25th and 75th percentiles. \*\*\*\*,  $P <$

285 0.0001. Below the asterisks are the precise statistical results. Source data are provided

286 as a Source Data file.

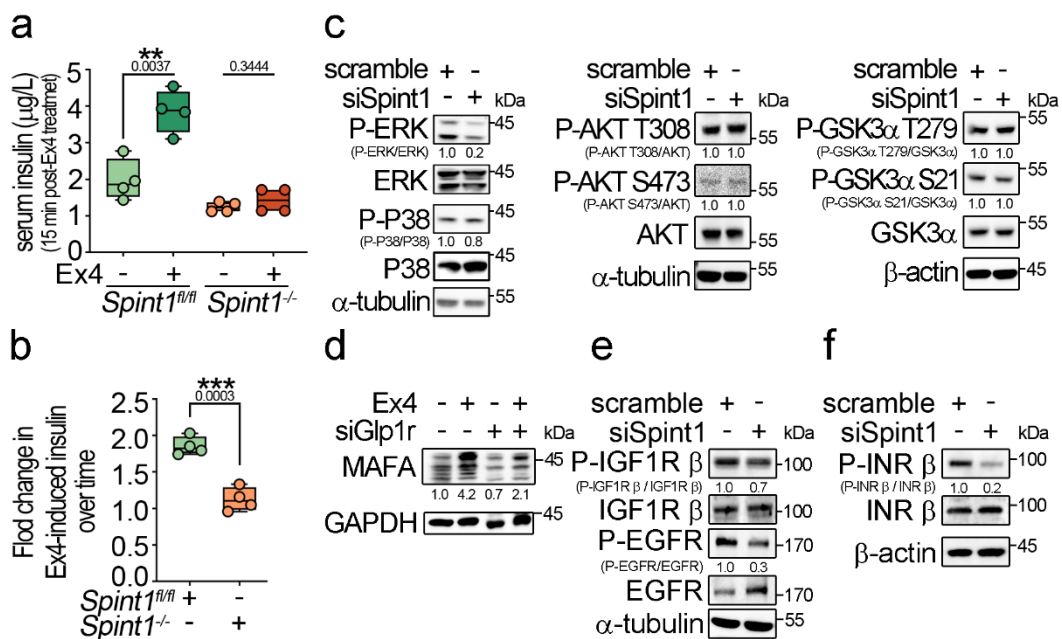

290 **Supplementary Fig. 8. Examination of the Extensin-4 inducing insulin levels in**

291 ***Spint1* knockout mice and exploring the roles of SPINT1 and HEPHSIN in**

292 **GLP1R-related signaling pathways.**

293 **a, Effect of Ex4 on upregulating insulin level in *Spint1*<sup>fl/fl</sup> and *Spint1*<sup>-/-</sup> mice 15**

294 **minutes post-administration. We injected Ex4 into mice following oral gavage of**

295 **glucose. Details of the experimental procedure are provided in Fig. 6k. Insulin levels**

296 **were measured 15 minutes post-administration using an ELISA kit (n = 4 per group).**

297 **b, Ex4-induced fold change in time-integrated insulin increases in *Spint1*<sup>fl/fl</sup> and**

298 ***Spint1*<sup>-/-</sup> mice described in Fig. 6l. Ex4 upregulated the normalized insulin response**

299 **over time (represented by insulin AUC/ β cell mass) approximately twofold in**

300 ***Spint1*<sup>fl/fl</sup> mice compared to that in *Spint1*<sup>-/-</sup> mice after Ex4 treatment. c, *Spint1***



301 silencing on the phosphorylation levels of ERK, P38, AKT, and GSK3 $\alpha$  in NIT-1  
302 cells. Cells were transfected with siSpint1. Scramble RNAs were used as a control.  
303 Two days after transfection, cell lysates were collected and subjected to western blot  
304 analysis using anti-phospho-ERK, anti-ERK, anti-phospho-P38, anti-P38, anti-  
305 phospho-AKT(T308), anti-phospho-AKT(S473), anti-AKT, anti-phosphoGSK3 $\alpha$   
306 (T279), anti-phospho-GSK3 $\alpha$  (S21) and anti-GSK3 $\alpha$  antibodies.  $\alpha$ -tubulin and  $\beta$ -actin  
307 served as loading controls. Western blot results were statistically calculated from  
308 three independent experiments. The mean values after quantification are shown at the  
309 bottom of each blot. **d**, Examination of GLP1R's role in the MAFA expression in  
310 NIT-1 cells. Cells were transfected with siGlp1r or scramble RNA (control). Two  
311 days after transfection, cells were treated with or without 25 nM Exendin-4 (Ex4) for  
312 24 hours. Cell lysates were then collected and subjected to immunoblotting using anti-  
313 MAFA and anti-GAPDH antibodies. The mean values of MAFA protein levels were  
314 statistically calculated with normalization to GAPDH from three independent  
315 experiments using ImageJ and shown at the bottom of the MAFA blot. **e-f**,  
316 Immunoblot analysis of the tyrosine phosphorylation levels of EGFR, IGF1R, and  
317 INR in *Spint1*-silenced NIT-1 cells. Cells were transfected with siSpint1. Scramble  
318 RNAs were used as a control. Two days after transfection, cell lysates were collected  
319 and subjected to western blot analysis using anti-phosphoEGFR (P-EGFR), anti-

320 EGFR, anti-phosphoIGF1R (P-IGF1R), anti-IGF1R, anti-phospho-Insulin receptor (P-  
321 INR), and anti-Insulin receptor (INR).  $\alpha$ -tubulin served as a loading control. ImageJ  
322 measured the mean values of tyrosine phosphorylation levels of these proteins with  
323 normalization to their corresponding protein levels from three independent  
324 experiments. Statistical significance was determined using a two-tailed Student's *t*-  
325 test for all panels. In the box plots, the boxes span from the 25th to the 75th  
326 percentiles, with a line indicating the median. Whiskers extend to values within 1.5  
327 times the interquartile range, defined as the difference between the 25th and 75th  
328 percentiles. \*\*,  $P < 0.01$ ; \*\*\*,  $P < 0.001$ . Below the asterisks are the precise statistical  
329 results. Source data are provided as a Source Data file.

330 Supplementary Figure 9

331

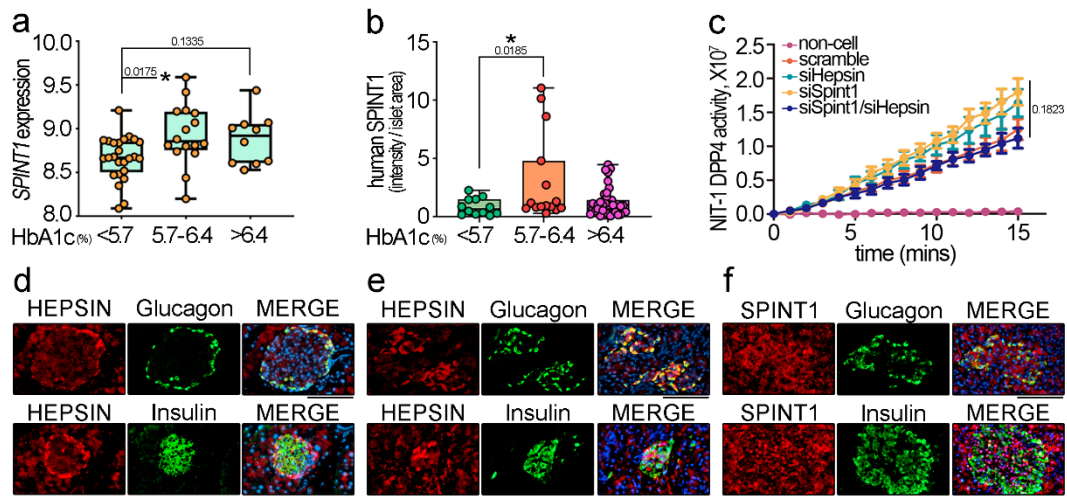

332

333 **Supplementary Fig. 9. Analysis of *SPINT1* expression in human diabetes**

334 **patients, DPP4 activities in *Spint1*- or *Hepsin*-silenced NIT-1 cells, and the**

335 **expression patterns of SPINT1 and HEP SIN in mouse and human islets.**

336 **a**, Analysis of *SPINT1* mRNA levels in prediabetes and diabetes patients. Using the  
 337 GSE38642 dataset, we categorized the patients into three groups based on their blood  
 338 glycated hemoglobin (HbA1c) values (orange spots) levels. Non-diabetes (n = 25):  
 339 HbA1c < 5.7%, Prediabetes (n = 16): HbA1c 5.7% to 6.4%, and Diabetes (n = 10):  
 340 HbA1c > 6.4%. The *SPINT1* expression levels in the human pancreas among these  
 341 three groups were statistically calculated. **b**, Analysis of SPINT1 expression levels in  
 342 the islets of human pancreas samples with different HbA1c levels after IHC analysis.  
 343 Human pancreas samples (n=66) were obtained from the Department of Pathology,  
 344 National Taiwan University Hospital. All cases were categorized into two groups

345 [undiagnosed diabetes (n = 27) and diagnosed diabetes (n = 39, HbA1c > 6.4%)]  
346 according to their clinical records. The undiagnosed diabetes group was further  
347 classified into two sub-groups according to their HbA1c values: HbA1c < 5.7% (n =  
348 12) and HbA1c 5.7% to 6.4% (n = 15). Human pancreatic sections underwent IHC for  
349 SPINT1 detection, and ImageJ was employed to measure the intensity of SPINT1  
350 signals per islet. **c**, Analysis of DPP4 activities in *Spint1*- or *Hepsin*-silenced NIT-1  
351 cells. NIT-1 cells were transfected with siSpint1 or siHepsin. Control cells were  
352 transfected with scramble RNAs. DPP4 activities were measured every 1 minute  
353 using a spectrophotometer at the wavelength 450 nm and statistically calculated from  
354 three independent experiments (n = 3). **d-f**, Localization of SPINT1 and HEPSIN in  
355 the  $\alpha$  cells (glucagon) and  $\beta$  cells (insulin) of pancreatic islets. Mouse (**d**) and human  
356 (**e** and **f**) pancreatic sections were subjected to immunofluorescence microscopy using  
357 anti-SPINT1 or anti-HEPSIN antibodies, visualized as red. Nuclei were  
358 counterstained with DAPI (blue). Subsequently, the samples were stripped (see  
359 Methods section) and subjected to immunofluorescence microscopy for insulin  
360 (green) and glucagon (green) detection. Scale bar, 20  $\mu$ m. Statistical significance was  
361 assessed by a one-way ANOVA with the Tukey's post-hoc test for all panels. In the  
362 box plots, the boxes span from the 25th to the 75th percentiles, with a line indicating  
363 the median. Whiskers extend to values within 1.5 times the interquartile range,

364 defined as the difference between the 25th and 75th percentiles. \*,  $P < 0.05$ . Below the  
365 asterisks are the precise statistical results. Source data are provided as a Source Data  
366 file.  
367

368 Supplementary Figure 10

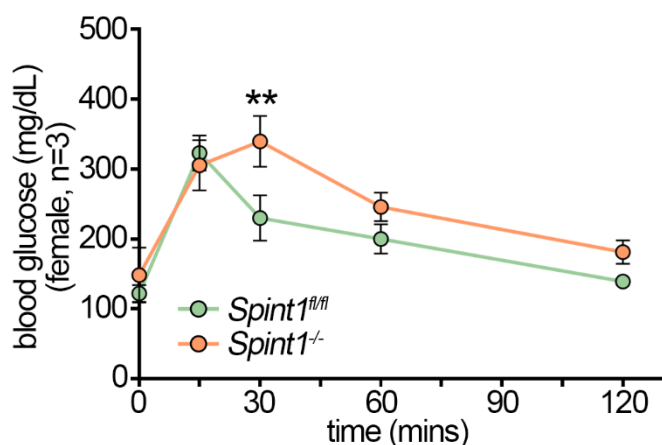

369

370 **Supplementary Fig. 10. Analysis of glucose tolerance in female 8-week-old**

371 ***Spint1<sup>fl/fl</sup>* and *Spint1<sup>-/-</sup>* mice.**

372 Female mice were fasted for 8 hours and then intraperitoneally injected with 20%

373 glucose solution (2 g/kg body weight). The tail blood samples were then taken at 15,

374 30, 60, and 120 minutes after injection and used to examine the glucose levels using a

375 glucometer (n = 3 per group). A two-way ANOVA followed by Sidak's multiple

376 comparison analysis assessed statistical significance. All data were represented as

377 mean  $\pm$  SEM. \*\*,  $P < 0.01$ . Source data are provided as a Source Data file.

378 Supplementary Figure 11

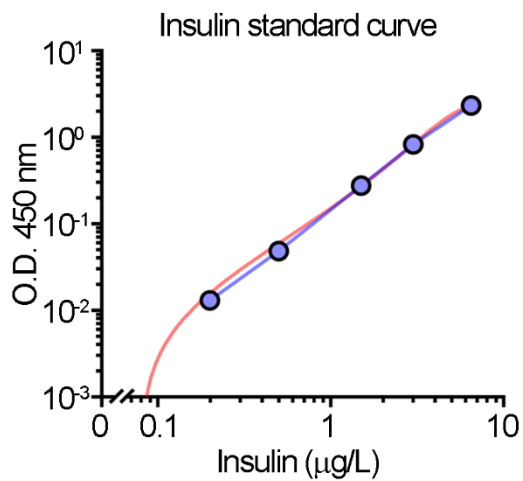

379

380 **Supplementary Fig. 11. Insulin standard curve.**

381 The logit-log plot represents the insulin ELISA standard curve, measured in

382 quadruplicate using four-parameter logistic regression. It was generated by plotting

383 insulin concentrations ranging from 0 to 6.5  $\mu\text{g/L}$ , including values of 0.2, 0.5, 1.5,

384 and 3.0  $\mu\text{g/L}$  ( $n=3$ ). Source data are provided as a Source Data file.

385

386 **Supplementary Methods**

387 **Liquid chromatography with tandem mass spectrometry (LC-MS/MS)**

388 LC-MS/MS analysis was performed on a nanoACQUITY UPLC system (Waters,  
389 Milford, MA) connected to the LTQ Orbitrap Velos hybrid mass spectrometer  
390 (Thermo Electron, Bremen, Germany) equipped with a PicoView nanospray interface  
391 (New Objective, Woburn, MA). Peptide mixtures were loaded onto a 75  $\mu\text{m}$  ID, 25  
392 cm length C18 BEH column (Waters, Milford, MA) and were separated using a  
393 segmented gradient at a 300 nl/min flow rate. Briefly, survey full scan MS spectra  
394 were acquired in the orbitrap ( $m/z$  350–1600) with the resolution set to 60 K at  $m/z$   
395 400 and automatic gain control (AGC) target at  $10^6$ . The 20 most intense ions were  
396 sequentially isolated for collision-induced dissociation MS/MS fragmentation and  
397 detection in the linear ion trap (AGC target at  $10^4$ ). Charge state screening was  
398 enabled for +2, +3, +4, and higher.

399 **Data analysis, Functional annotation, and Ingenuity Pathway Analysis**

400 Raw MS data were analyzed using the MaxQuant program (version 2.2.0.0). The  
401 proteins and peptides required a false discovery rate (FDR) of 0.01 and a minimum  
402 peptide length of 6 amino acids. MS/MS spectra were searched against the  
403 UNIPROTKB/SWISS-PROT database. SILAC states of peptides were determined  
404 using the MaxQuant program based on mass differences between SILAC peptide



405 pairs. Next, the information was used for searches with fixed Arg10 or Lys8  
406 modifications. We chose those identified proteins present in *Spint1*<sup>-/-</sup>/NIT-1 and  
407 *Spint1*<sup>fl/fl</sup>/NIT-1 samples for further analysis. Differentially regulated proteins were  
408 sorted into two groups according to the *Spint1*<sup>-/-</sup>/NIT-1 to *Spint1*<sup>fl/fl</sup>/NIT-1 protein ratio  
409 ( $\log_2(\text{ratio}) > 0.5$ , up-regulated group;  $\log_2(\text{ratio}) < -0.5$ , down-regulated). Each  
410 protein group was uploaded to the Database for Annotation, Visualization, and  
411 Integrated Discovery (DAVID) (<https://david.ncifcrf.gov/tools.jsp>) gene  
412 bioinformatics resources to identify Gene Ontology (GO) terms. All annotated  
413 proteins with their protein ratios were analyzed using the Ingenuity Pathway Analysis  
414 (IPA) software (QIAGEN Inc., Hilden, Germany) to identify the highly regulated  
415 pathways, which were ranked according to their log ratios ( $-\log P$  value).

#### 416 **Measurement of DPP4 activity**

417 The siRNA-transfected NIT-1 cells were replaced with serum-free media  
418 containing 10  $\mu\text{M}$  of a DPP4 artificial substrate (H-Gly-Pro-AMC, Merck Millipore).  
419 After the administration of the DPP4 synthetic substrate, the fluorescence intensity  
420 (excitation wave: 360 nm; emission wave: 460 nm) was measured every minute within  
421 the 15-minute period using a spectrophotometer.

#### 422 **Co-immunoprecipitation analysis**

423 HEK293T cells were seeded at a density of  $2 \times 10^6$  cells in a 10-cm plate with  
424 DMEM. The next day, cells were transfected with three plasmids, each encoding  
425 *3xFlag-Glp1r-myc*, *Spint1-his-myc*, and *Hepsin-his-myc* cDNA, using Lipofectamine  
426 3000. After 48 hours, cells were lysed using immunoprecipitation (IP) buffer (1% Triton  
427 X-100 in PBS), and cell lysates were centrifuged at 12,000 rpm at 4°C for 15 minutes.  
428 The supernatants were then collected and subjected to IP using anti-SPINT1, anti-  
429 HEPSIN, and anti-FLAG (for Flag-GLP1R protein, F3165, Sigma-Aldrich) antibodies  
430 at 4°C overnight. The samples were then incubated with protein A magnetic beads  
431 (28978116, Cytiva, USA) at 4°C for 2 hours, and the beads were then isolated using a  
432 magnetic rack. The beads were washed three times using IP buffer, and the proteins  
433 were eluted using elution buffer (1M glycine, pH 2.0). The samples were then subjected  
434 to immunoblotting analysis.

#### 435 **BrdU incorporation assay**

436 *Spint1<sup>fl/fl</sup>* and *Spint1<sup>-/-</sup>* mice were treated with 1 mg/mL BrdU (HY-15910,  
437 MedChemExpress) in their sterile drinking water for 14 days. BrdU-containing  
438 drinking water was refreshed daily. After the BrdU treatment, mouse pancreases were  
439 isolated and subjected to immunofluorescence microscopy. Before inoculation with the  
440 anti-BrdU antibody (66241-1-Ig, Proteintech), samples were incubated in 1M HCL for  
441 30 minutes. After overnight incubation with anti-BrdU antibody, samples were treated

442 with fluorescent secondary antibody for 30 minutes. Following three PBS washes,  
443 samples were explored to 0.25% Sudan Black B to minimize autofluorescence.  
444 Subsequently, PBS washes were performed before covering with fluorescence  
445 mounting reagent.

#### 446 **Streptozotocin treatment to induce mouse diabetes**

447 To induce mouse diabetes, mice were intraperitoneally injected with 40 mg/kg  
448 streptozotocin (STZ, Sigma-Aldrich) per day for five days, following a protocol  
449 established previously<sup>1</sup>. STZ solution was freshly prepared from STZ stock solution  
450 with a concentration of 6 mg/mL in 50 mM of sodium citrate buffer (pH 4.5). Mice then  
451 received a standard diet with 10% sucrose water. Five days after the treatment with STZ  
452 injection and 10% sucrose water, the mice were supplied with regular water.

#### 453 **Lentiviral particle preparation and infection**

454 The small hairpin RNAs [shHepsin #1 (TRCN0000054789) and shHepsin #2  
455 (TRCN0000054790)] for HEP SIN depletion were obtained from the National RNAi  
456 Core Facility of Academia Sinica, Taiwan. An shRNA against luciferase (shLuc) was  
457 used as a control. Lentivirus was produced from the HEK293T transfectants with co-  
458 transfection of pCMVdR8.91, pMD.G, and pLKO.1-puro shRNA plasmids (with a ratio  
459 of 9: 1: 10) using Lipofectamine 3000 (DNA: liposome = 5 µg: 15 µL), according to  
460 the recommended protocol (Invitrogen, CA, USA). The conditioned media of the

461 transfected cells containing lentiviral particles were collected at 48 hours. For infection,  
462 NIT-1 cells were seeded with a density of  $1 \times 10^6$  cells per 60-mm culture dish, and  
463 50% (v/v) of the lentivirus-containing medium was added in a regular culture medium.  
464 After incubation for 48 hours, the cells were subjected to Western Blot assay.

#### 465 **Human pancreatic tissues**

466 The Department of Pathology, National Taiwan University Hospital (NTUH)  
467 provided archived human pancreas tissues with the approval of the Research Ethics  
468 Committee of NTUH (case number: 202306101RINB). Written informed consent was  
469 obtained from all patients, and the protocol followed the Declaration of Helsinki. These  
470 archived human pancreatic tissues were obtained from patients previously admitted to  
471 NTUH, diagnosed with benign pancreatic neoplasms, and undergoing pancreatectomy;  
472 thirty-nine had diabetes, while twenty-seven did not.  
473

## Supplementary Table

### Supplementary Table S1

| Table S1. Primers used to Southern Blot and Genotyping |                                                                                   |                                                    |                        |
|--------------------------------------------------------|-----------------------------------------------------------------------------------|----------------------------------------------------|------------------------|
| Southern Blot probe (5'-3')                            |                                                                                   | TCAACCTTGATTTTAGCCAAGAGTGACTTTGAACTCCTGATCTTCCTGCC |                        |
|                                                        | length (bp)                                                                       | Forward primer (5'-3')                             | Reverse primer (5'-3') |
| <i>Spint1-lacZ</i>                                     | 461                                                                               | CAGGTGAAGGAAGCCTCAAG                               | AGAGGGACCTGGCTCCTATG   |
| <i>Spint1</i>                                          | 656 (for wild-type <i>Spint1</i> )<br>690 (for <i>loxP</i> floxed <i>Spint1</i> ) | GTCCAGCCCATCTTTAGCAG                               | ACCGTAAACGAGACGAGTGG   |
| <i>Cre</i>                                             | 280                                                                               | ATGCTTCTGTCCGTTTGCCG                               | TGAGTGAACGAACCTGGTCCG  |

### Supplementary Table S2

| Table S2. Primers used to qPCR |                            |                            |
|--------------------------------|----------------------------|----------------------------|
| mouse                          | Forward primer (5'-3')     | Reverse primer (5'-3')     |
| <i>Spint1</i>                  | CCGAAGGAGGGCTTCATCAAC      | G TTCAGTACCAGGGGCTTCTGC    |
| <i>Mafa</i>                    | TTCAGCAAGGAGGAGGTCAT       | CCGCCAACTTCTCGTATTTTC      |
| <i>Hepsin</i>                  | TACCTCCCTTTTCGAGACCCT      | CCATAGAAGTGTGTGTACCCCA     |
| <i>St14</i>                    | CGCGGGACTCAAGTACAACCTCC    | GCCTCGTTCTCCACTTTCTTG      |
| <i>Tmprss15</i>                | GCTGTGTGCGTTTTCTTAATGG     | GCACTCCCTAGTCCCAGAAGAT     |
| <i>Tmprss7</i>                 | TGTTGGAATGTTCCGCATCAC      | GGTTTACCACTTGCTGTACTGT     |
| <i>Tmprss4</i>                 | CAACCCCTCAACAACCGTGAT      | CTCAGCAGCACTGCAATGAT       |
| <i>Tmprss2</i>                 | ATGCTCCGAGGATTACAACGC      | CGAGGGCTAAACACAGCGATT      |
| <i>Ins1</i>                    | GGGGAGCGTGGCTTCTTCTA       | ACCTCCAACGCCAAGGTCTG       |
| <i>Ins2</i>                    | GGGGAGCGTGGCTTCTTCTAC      | CCACCTCCAGTGCCAAGGTC       |
| <i>Gapdh</i>                   | AGGTCGGTGTGAACGGATTTG      | GGGGTCGTTGATGGCAACA        |
| human                          | Forward primer (5'-3')     | Reverse primer (5'-3')     |
| <i>SPINT1</i>                  | GACTTGAAGGTACAACCCAG       | TGGGTGGTCTGAGCTAGTCAC      |
| <i>MAFA</i>                    | AGCGAGAAGTGCCAACCTCC       | TTGTACAGGTCCCGCTCTTT       |
| <i>HEPSIN</i>                  | CCCCTGCCCTCACAGAATA        | AGTCAGCGCCATTGCAGAC        |
| <i>INS</i>                     | ACGAGGCTTCTTCTACACACC      | TCCACAATGCCACGCTTCTGCA     |
| <i>GAPDH</i>                   | AAAGGATCCACTGGCGTCTTACCACC | GAATTCGTCATGGATGACCTTGCCAG |

### Supplementary Table S3

#### Recombinant protein and antibody used

|                             | company     | Catalog No. | Purpose        | Conditions                 |
|-----------------------------|-------------|-------------|----------------|----------------------------|
| Rt-mSPINT1 protein          | R&D         | 1141-PI-010 | Cell treatment | 0, 0.4, 0.8, and 1.6 µg/mL |
| His-tag monoclonal antibody | ProteinTech | 66005-1-Ig  | Western blot   | 1:100 in 5% Milk           |

## Reference

1. Wu KK, Huan Y. Streptozotocin-Induced Diabetic Models in Mice and Rats.  
*Current Protocols in Pharmacology*, (2008).
