# Supplementary material for: Spint1 disruption in mouse pancreas leads to glucose intolerance and impaired insulin production involving HEPSIN/MAFA
Source: PubMed Central journal article supplement — Nat Commun. 2024 Dec 3;15:10537. doi: 10.1038/s41467-024-54927-2 (PMC11615295; doi:10.1038/s41467-024-54927-2), 2024-12-03
Supplement: 41467_2024_54927_MOESM2_ESM.pdf [file 41467_2024_54927_MOESM2_ESM.pdf]

## **Description of Additional Supplementary Files**

**Supplementary Data 1** – SILAC exported data for Figure 3a
